# Supplementary material
Source: PubMed Central journal article supplement (PMC6649028)
Supplement: ao9b00330_si_001.pdf [file ao9b00330_si_001.pdf]

# Supporting Information

## Synthesis and characterization of a SWCNT@HKUST-1 composite: Enhancing the CO<sub>2</sub> adsorption properties of HKUST-1

*Jonathan Cortés-Suárez,<sup>a</sup> Vanessa Celis-Arias,<sup>a</sup> Hiram I. Beltrán,<sup>a</sup> Adriana Tejeda-Cruz,<sup>b</sup> Ilich  
A. Ibarra,<sup>c,\*</sup> Josué E. Romero-Ibarra,<sup>b</sup> Eli Sánchez-González,<sup>c,\*</sup> and Sandra Loera-Serna<sup>a,\*</sup>*

<sup>a</sup> Departamento de Ciencias Básicas, Universidad Autónoma Metropolitana-Azcapotzalco, Av. San Pablo 180, Del. Azcapotzalco, 02200, Ciudad de México, Mexico.

<sup>b</sup> Instituto de Investigaciones en Materiales, Universidad Nacional Autónoma de México, Circuito Exterior s/n, CU, Del. Coyoacán, 04510, Ciudad de México, Mexico.

<sup>c</sup> Laboratorio de Físicoquímica y Reactividad de Superficies (LaFReS), Instituto de Investigaciones en Materiales, Universidad Nacional Autónoma de México, Circuito Exterior s/n, CU, Del. Coyoacán, 04510, Ciudad de México, Mexico.

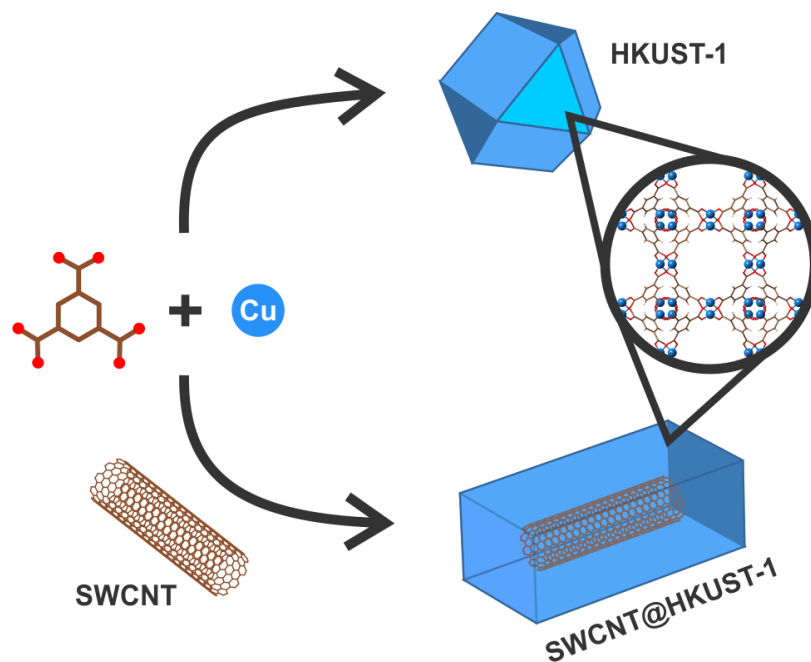

**Scheme S1.** Synthetic strategy for SWCNT@HKUST-1. HKUST-1 synthesis consists of the dropwise addition of a copper ethanolic solution into an aqueous solution of the deprotonated ligand, affording cuboctahedral crystals. When the SWCNT are added into the mixture, the SWCNT@HKUST-1 composite is obtained.

## 1. Thermogravimetric Analysis

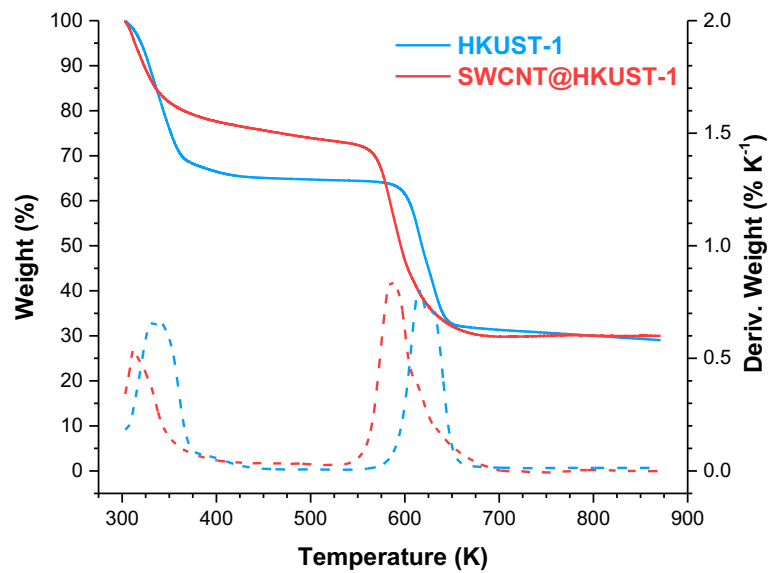

**Figure S1.** TGA trace for the HKUST-1 (blue) and SWCNT@HKUST-1 composite (red), dashed line represents the derivate of weight.

## 2. Powder X-Ray Diffraction

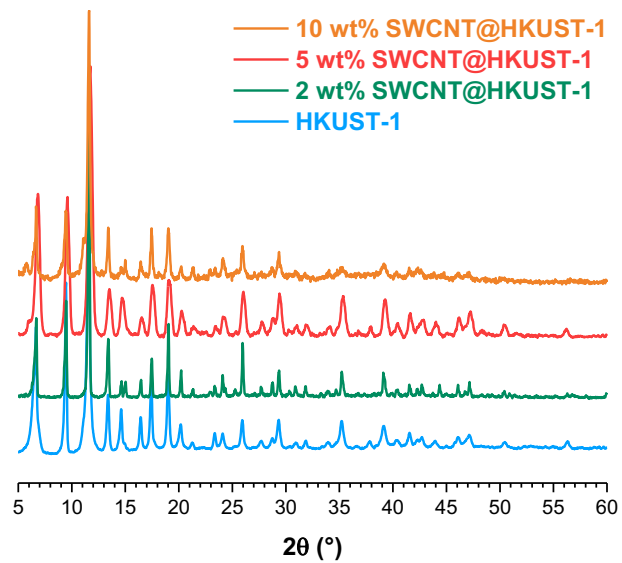

**Figure S2.** PXRD patterns of the HKUST-1 and SWCNT@HKUST-1 samples (2, 5 and 10 wt% of SWCNT).

### 3. Electron Microscopy

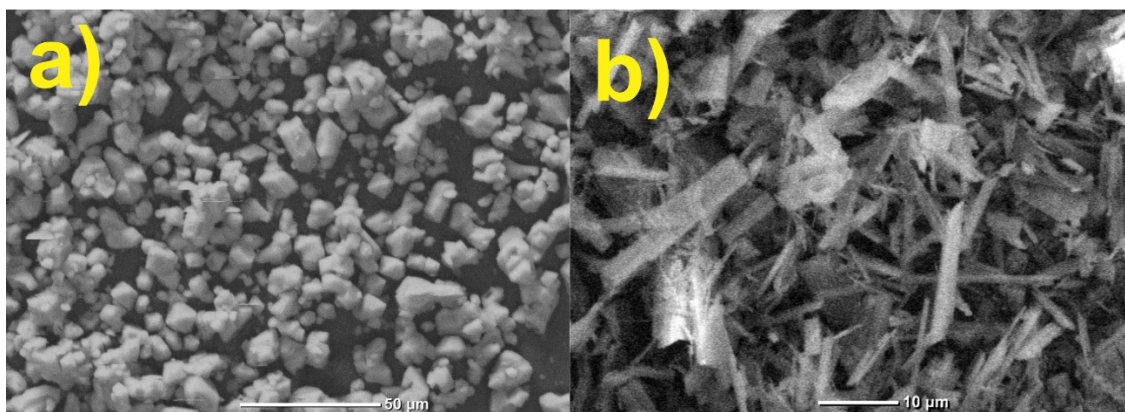

**Figure S3.** SEM micrographs of HKUST-1 a) and 5 wt% SWCNT@HKUST-1 b), featuring the rod-like crystals of the composite.

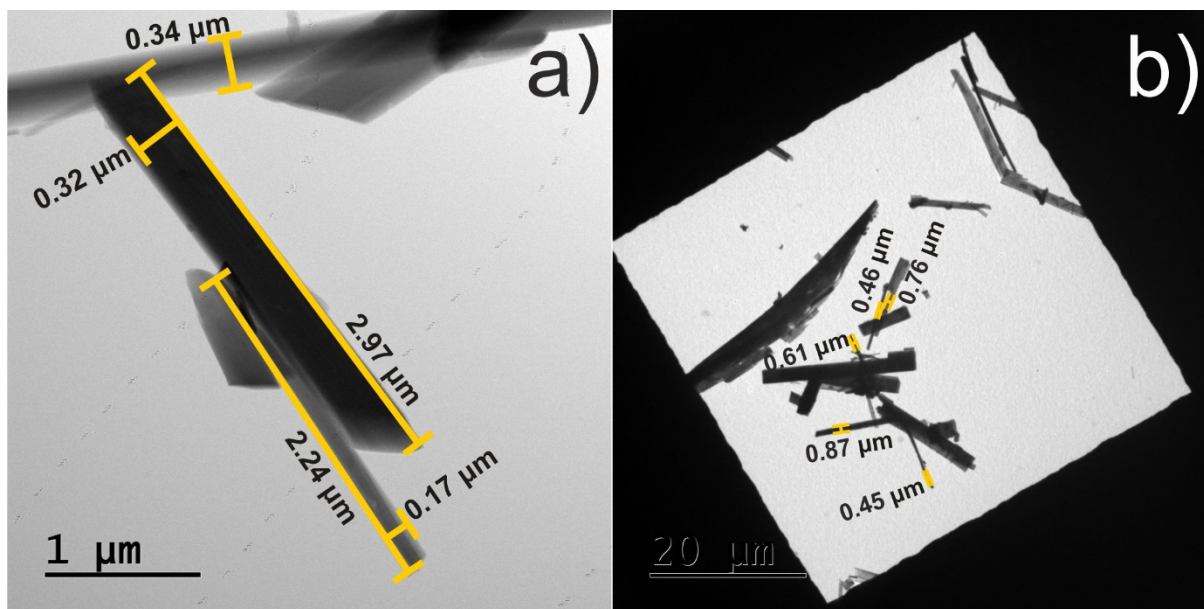

**Figure S4.** TEM micrographs of 5 wt% SWCNT@HKUST-1 a) rod-like crystals and b) conglomerate, marked length and width of the crystals.

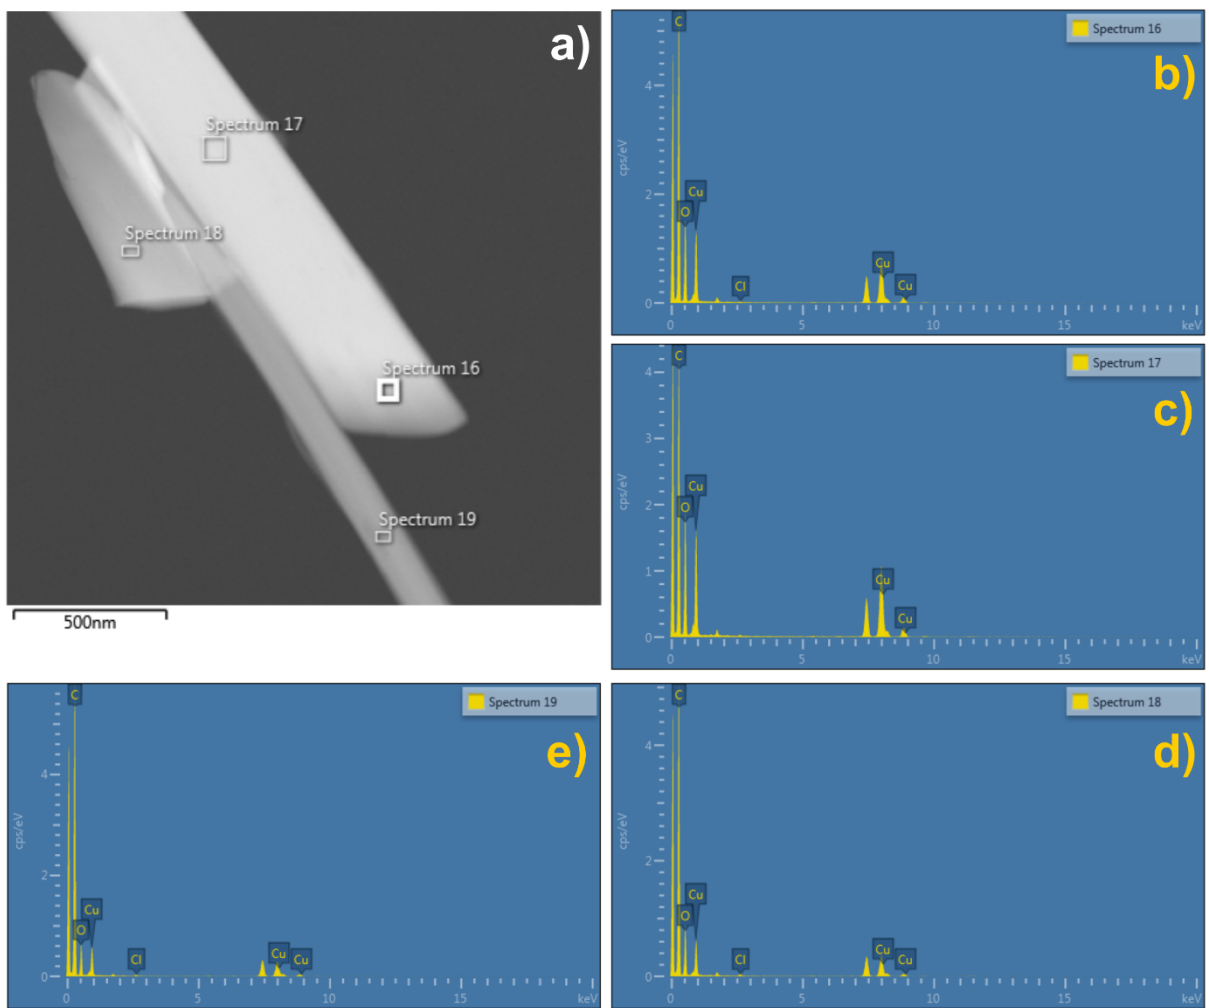

**Figure S5.** a) TEM micrograph of 5 wt% SWCNT@HKUST-1 b), c), d) and e) EDX spectra of different crystals of the composite.

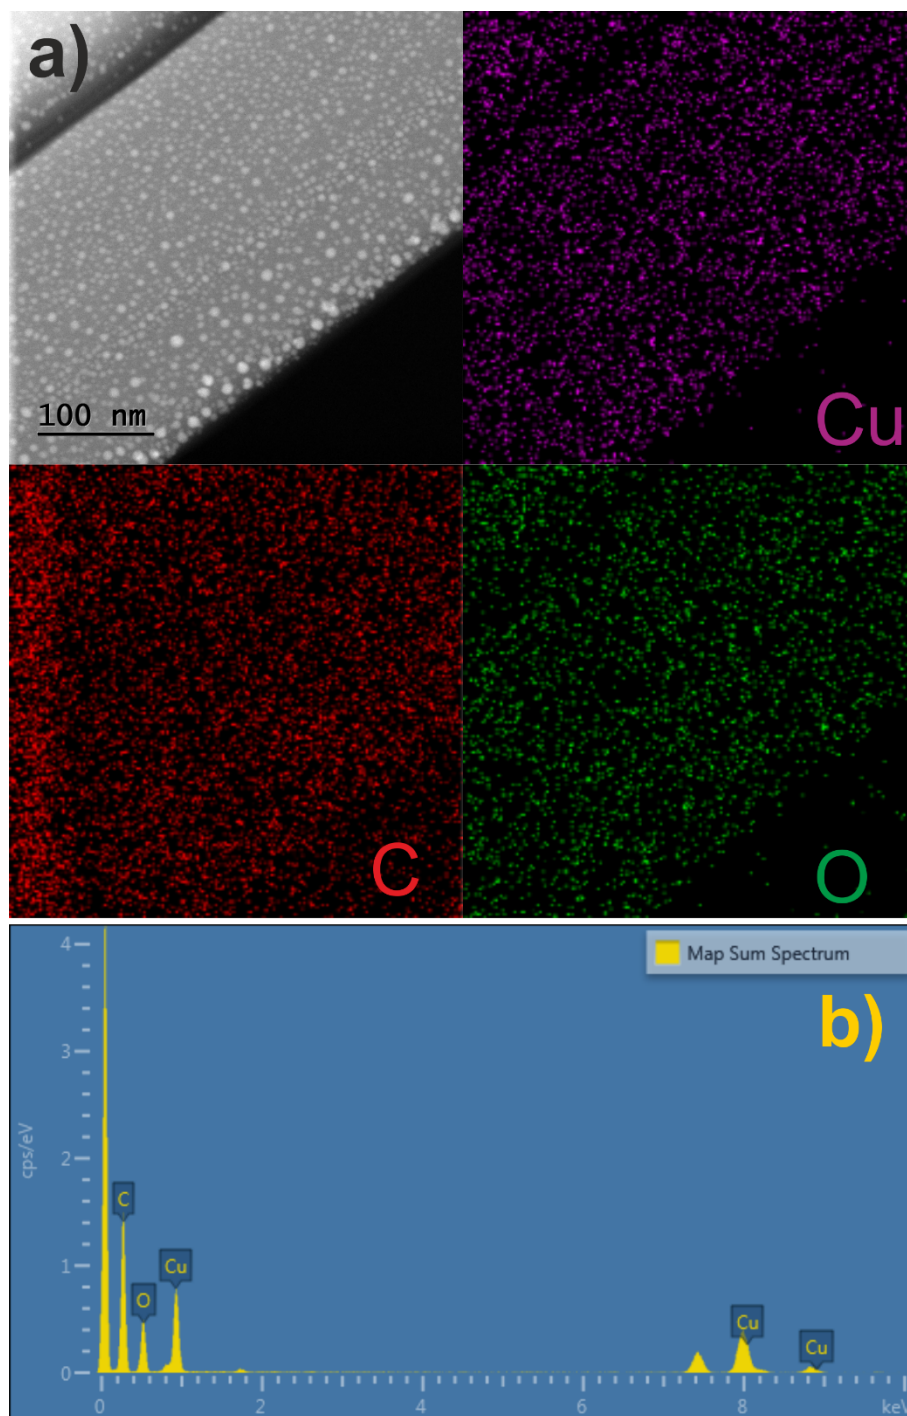

**Figure S6.** a) TEM micrograph of HKUST-1 with elemental mapping (purple: copper; red: carbon; green: oxygen), and b) EDX spectra.

#### 4. RAMAN

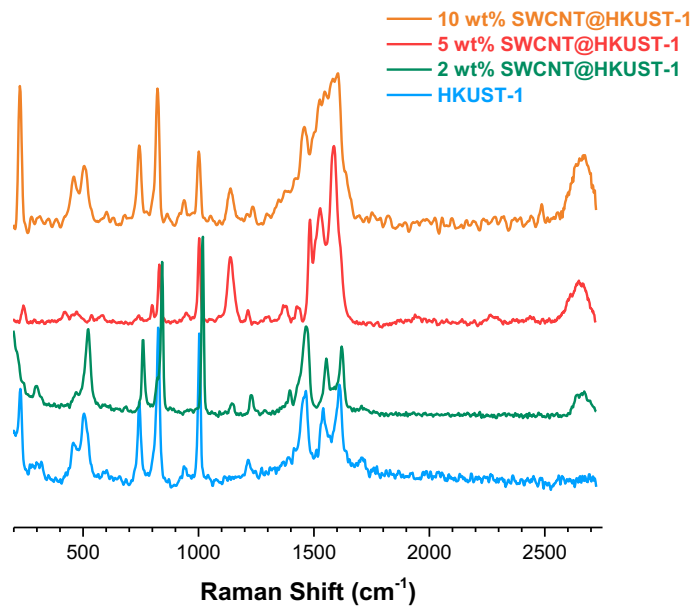

**Figure S7.** Raman spectra for HKUST-1 and the SWCNT@HKUST-1 composites with 2, 5 and 10 wt% of SWCNT.

#### 5. Isotheric Heat of Adsorption

The CO<sub>2</sub> heat of adsorption,  $\Delta H$ , was calculated by the isosteric method for the 5 wt% SWCNT@HKUST-1 composite, using the CO<sub>2</sub> adsorption isotherms at 212 and 231 K (Figure S8, left). A virial-type equation was used to fit the adsorption isotherms:

$$\ln\left(\frac{n}{p}\right) = A_0 + A_1n + A_2n^2 + \dots \quad \text{Equation S1}$$



where  $p$  is the pressure,  $n$  is the amount adsorbed and  $A_0, A_1, \dots$  are the virial coefficients ( $A_2$  and higher terms can be ignored at lower coverage values). A plot of  $\ln(n/p)$  versus  $n$  should give a straight line at low surface coverage (Figure S8, right).

Using the Clausius Clapeyron equation (Equation S2) for a fixed surface coverage ( $\theta$ ), the Equation S3 is obtained. By the substitution of  $p$  in Equation S3 with Equation S1, results an expression of the isosteric heat of adsorption (Equation S4). From the linear fittings, the virial coefficients are used to estimate the isosteric heat of adsorption.

$$\left(\frac{\partial \ln(p)}{\partial T}\right)_\theta = \frac{Q_{ST}}{RT^2} \quad \text{Equation S2}$$

$$\ln\left(\frac{p_1}{p_2}\right) = \frac{Q_{ST}}{R} \left(\frac{1}{T_2} - \frac{1}{T_1}\right) \quad \text{Equation S3}$$

$$Q_{ST} = R \left[ (A_0^{T_2} - A_0^{T_1}) + (A_1^{T_2} - A_1^{T_1}) n \right] \left( \frac{T_1 T_2}{T_1 - T_2} \right) \quad \text{Equation S4}$$

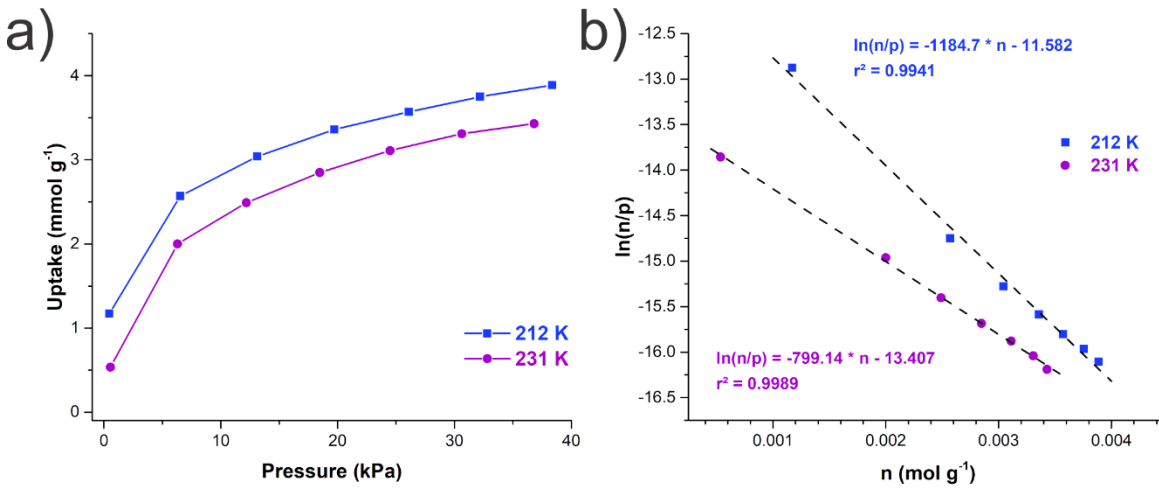

**Figure S8.** 5 wt% SWCNT@HKUST-1 a) CO<sub>2</sub> adsorption isotherms at 212 and 231 K, and b) virial plots for the CO<sub>2</sub> adsorption.
